# Supplementary material for: Exactly controlled linear CO liberation: an A- and B-ring simultaneously extended flavonol-based red fluorescent photoCORM
Source: Royal Society of Chemistry journal article supplement (doi:10.1039/d3ob00408b), 2023-01-01
Supplement: d3ob00408b1.pdf [file d3ob00408b1.pdf]

## Supplementary Information

# Exactly Controlled Linear CO Liberation: A- and B-Ring Simultaneously Extended Flavonol-Based Red Fluorescent PhotoCORM

## Table of Contents

### Experimental Section

Materials and Instruments.

Spectral Properties.

CO Photo-releasing Reaction Kinetics and Their Products Analysis

Photo-release of CO in HeLa Cells

Synthesis of **Nbp-flaH**.

### Table Caption

**Table S1.** Comparison of the flavonol based photoCORMs.

### Figure Caption

**Figure S1.** Spectral features of **Nbp-flaH** in various solvents.

**Figure S2.** (a) Absorption and (b) fluorescence spectra of **Nbp-flaH**. (c) The photos of the corresponding solution color under ambient light (left) and 365 nm light (right).

**Figure S3.** The time-dependent spectral change and time traces (insets) of **Nbp-flaH** under N<sub>2</sub> and dark.

**Figure S4.** The HPLC–MS spectra for the photo-reaction organic products of **Nbp-flaH**.

**Figure S5.** (a) The calibration curve of the CO concentration analysis by GC analysis. (b) GC spectrum for the photo-reaction gas product CO from **Nbp-flaH**.

**Figure S6.** (a) Cyclic voltammograms of **Nbp-flaH** (2 mM in DMF) under N<sub>2</sub> (red), subsequently under air (black) at rt. (b) Absorption spectra of **Nbp-flaH** (0.4 mM in DMF) in the absence (under N<sub>2</sub>, black) and presence of NBT (0.4 mM in DMF) under N<sub>2</sub> (red) and O<sub>2</sub> (blue) at rt.

**Figure S7.** Plots of the cell viability vs. analyte concentration. (a) **Nbp-flaH**, (b) the **Nbp-flaH** photolysis products.

**Figure S8.** The confocal fluorescence images of before and after the **Nbp-flaH**-treated HeLa cells were irradiated by visible light or sun light in air at rt.

**Figure S9.** FT-IR spectra of **Nbp-flaH**

**Figure S10.** <sup>1</sup>H NMR spectrum of **Nbp-flaH**.

**Figure S11.** <sup>13</sup>C NMR spectrum of **Nbp-flaH**.

**Figure S12.** HRMS spectrum of **Nbp-flaH**.

## Experimental Section

### Materials and Instruments.

The chemicals and reagents used in this experiment are of analytical grade or chromatographic grade and further purified by the standard method if necessary. FT-IR spectra were recorded with a Nicolet 6700 spectrophotometer.  $^1\text{H}$  NMR and  $^{13}\text{C}$  NMR spectra were recorded on a Bruker 400 WB and 500 WB, respectively (TMS as the internal standard). UV-vis spectra were measured using an Agilent Technologies HP8453 diode array spectrophotometer. The fluorescence spectra were recorded on an FL 6500 fluorescence spectrophotometer (Perkin Elmer Co., Ltd.). ESI-MS (electrospray ionization mass spectra) measurements were performed on Agilent Technologies HP1100LC-MSD. The organic reaction products analysis was performed on a Thermo Fisher Scientific LTQ Orbitrap XLHPLC-MS. The CO concentration was determined using a GC (Techcomp 7900, Shanghai Jingke). The cytotoxicity assay was accomplished using the MTT method with a microplate reader (Infinite M200 Pro). The Cell images were performed with a confocal laser scanning microscope (LEICA TCS SP5 II, Germany). Cyclic voltammetry data was collected using a CHI620b system. All CV data were obtained under  $\text{N}_2$  in DMF with an **Nbp-flaH** concentration of 2 mM and  $\text{KClO}_4$  (0.1 M) as the supporting electrolyte. The scan rate was  $50 \text{ mV s}^{-1}$ . The experimental setup consisted of a glassy carbon working electrode, a silver reference electrode, and a platinum wire auxiliary electrode. All potentials are reported vs. SCE.

### Spectral Properties.

The stock solutions of **Nbp-flaH** (1 mM) were prepared in DMSO. For typical absorption and fluorescence spectra measurements, **Nbp-flaH** was diluted to  $10 \mu\text{M}$  in DMSO-PBS buffer (1:1, V/V, 10 mM, pH 7.4). 3.0 mL of the resulting solution was placed in a 10 mm path-length quartz cell. Then the UV-vis and the fluorescence spectra in different solvents were recorded at  $37 \text{ }^\circ\text{C}$ . The fluorescence spectra collection conditions were optimized as the excitation wavelength  $\lambda_{\text{ex}} = 405$

nm, slit width:  $d_{\text{ex}} = d_{\text{em}} = 10$  nm.

### **CO Photo-releasing Reaction Kinetics and Their Products Analysis**

**CO Photo-releasing Reaction Kinetics:** The **Nbp-flaH** ( $10 \mu\text{M}$  in 3 mL DMSO-PBS buffer (1:1, V/V, 10 mM, pH 7.4)) solution was irradiated by visible light (intensity =  $5.33 \times 10^3$  lx) under  $\text{O}_2$  with stirring at rt. The absorption and fluorescence spectra were recorded in 1–10 min time intervals until the reaction was finished. The reaction process was monitored by the disappearance of the 420 nm absorbance or the 610 nm fluorescence intensity (accompanying the red fluorescence quenching).

**Gas Product Analysis:** The  $\text{O}_2$  saturated solution of **Nbp-flaH** (the desired concentration (20–60  $\mu\text{M}$ ) in 1 mL ethanol) in a fixed volume flask was sealed. The solution was irradiated by visible light (intensity =  $0.23\text{--}2.89 \times 10^3$  lx) for the desired time with stirring at rt. The photoreaction process was followed by monitoring the disappearance of the bright red fluorescence using a 365 nm UV lamp. After **Nbp-flaH** was decomposed completely, the irradiation was stopped. After finishing the visible light irradiation, the reaction solution was stirred for 12 minutes. Then the headspace gas (1 mL), including released CO, was injected into a Gas Chromatography with an FID (flame ionization detector) (CO was reduced to methane by translation stove) (5A column (TDX-01: 4 mm  $\times$  3 m, Column number: TL0686)). The GC spectra were recorded, and the concentration and yield of the released CO were calculated using the standard calibration curve.

**Organic Product Analysis:** After the photo-reaction in ethanol (4.5% DMF), the reaction solution was concentrated by evaporation and the remaining residue was dissolved in 5 mL of ethanol (total 0.5 mM). The reaction mixture was injected into HPLC–MS for organic products analysis with an online DAD detector ( $\lambda$ : 254 nm) at rt. The analysis conditions are as follows. Column: Hypersil GOLD C 18 column, Thermo Fisher Scientific 150 mm  $\times$  2.1 mm, 5  $\mu\text{m}$ ; Mobile phase: MeOH and HOAc- $\text{NH}_4\text{OAc}$  buffer solution (5 mM, pH = 3) with some gradient; Flow rate:  $0.5 \text{ mL min}^{-1}$ .

## Photo-release of CO in HeLa cells

**Cell Culture and Cytotoxicity Assay:** Cytotoxicity was investigated by the MTT [3-(4,5-dimethyl-2-thiazolyl)-2,5-diphenyl-2H-tetrazolium bromide] method. HeLa cells were seeded in a 96-well culture plate with a Dulbecco's Modified Eagle's Medium (DMEM, 10% FBS (fetal bovine serum), 100 mg/mL penicillin and 100  $\mu$ g/mL streptomycin) and cultured in a 5% CO<sub>2</sub>, humidified incubator for 24 h at 37 °C. The cells were treated in quintuplicate wells with each concentration of neat test compounds (final concentration of 1, 5, 10 and 15  $\mu$ M in DMEM (DMSO = 0.2%, including a vehicle control)) and then incubated for 24 h in the dark. After removing the medium, the cells were washed 3 times with isotonic saline solution and then incubated with MTT (0.5 mg/mL in isotonic saline solution, 100  $\mu$ L each well) for 4 h. After removing the medium, 200  $\mu$ L DMSO was added to each well to dissolve the formazan crystals. Then the 490 nm and 750 nm (reference wavelength) absorbance were measured by a microplate reader.

The cell viability was calculated as follows:

Cell viability (%) = (average absorbance of treatment group - average absorbance of the blank group) / (average absorbance of the control group - average absorbance of the blank group)

**Imaging of the CO Photo-releasing in HeLa cells:** HeLa cells were seeded in the petri dish with a DMEM medium and cultured in a 5% CO<sub>2</sub>, humidified incubator for 24 h at 37 °C and allowed to adhere to the petri dish. To track the CO photo-releasing process of **Nbp-flaH**, HeLa cells were incubated with **Nbp-flaH** (10  $\mu$ M in isotonic saline solution with 0.2% DMSO, 30 min) at 37°C. After the HeLa cells were washed with isotonic saline solution 3 times, then imaged by confocal fluorescence microscope in the red channel ( $\lambda_{ex}$  = 405 nm,  $\lambda_{em}$  = 598–618 nm). Then, the CO-releasing process of **Nbp-flaH** in HeLa cells was imaged (1.5 s interval time) and tracked in situ *via* continuous irradiation by 405 nm laser (0.83 mW, 91% laser power) in the air at rt. To demonstrate that **Nbp-flaH** can also be photo-released by visible light or sunlight in living HeLa cells, after

imaging **Nbp-flaH**-treated HeLa cells, 1 mL DMEM medium was added to HeLa cells. Then, HeLa cells were irradiated by visible light (intensity =  $5.6 \times 10^2$  lx, 10 min) or sun light (17 °C, 1 h) in the air at rt. Wash HeLa cells with isotonic saline solution three times and then image them.

### Synthesis of **Nbp-flaH**.

**Nbp-flaH** was synthesized according to the following procedure (Scheme S1)<sup>1</sup> and characterized by FT-IR, <sup>1</sup>H NMR, <sup>13</sup>C NMR and HRMS (Figure S5– Figure S8).

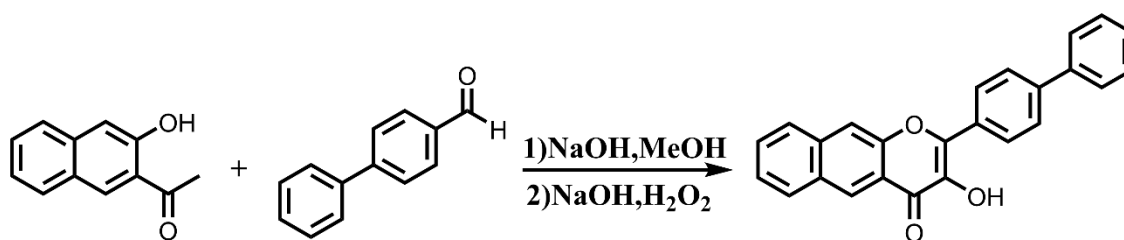

**Scheme S1.** The synthesis procedure of **Nbp-flaH**

The mixture of [1,1'-biphenyl]-4-carbaldehyde (0.40 g, 2.15 mmol) and sodium hydroxide (0.24 g, 6 mmol) in 100 mL anhydrous methanol was stirred and refluxed at 66°C. Then 1-(3-hydroxynaphthalen-2-yl) ethan-1-one (0.39 g, 2.15 mmol, dissolved in 2.5 mL methanol and 1.5 mL dichloromethane) was slowly added. After 4 hours of reaction, lower the reaction temperature to room temperature. Then 0.5 mL of hydrogen peroxide was slowly added dropwise at 0°C, Precipitation gradually appeared in the reaction solution, after 5 hours of reaction, a large amount of precipitation appeared, pour into crushed ice water, stir, filter with suction, wash with ice water. The obtained crude product (yellow solid) was purified by column chromatography ( $R_f = 0.57$ , dichloromethane:petroleum ether = 2:1). Finally got yellow solid pure product (0.55 g, 70 %), The molecular formula is C<sub>25</sub>H<sub>16</sub>O<sub>3</sub>. HRMS (ESI):  $m/z$  (pos.): calculated for [M + H]<sup>+</sup>: 365.1166, [M + Na]<sup>+</sup>: 387.0986, [2M + Na]<sup>+</sup>: 751.2085, Found for [M + H]<sup>+</sup>: 365.1166, [M + Na]<sup>+</sup>: 387.0986, [2M

+ Na]<sup>+</sup>: 751.2085. <sup>1</sup>H NMR (400 MHz, DMSO-*d*<sub>6</sub>): δ (ppm) = 9.73 (s, 1H), 8.86, (s, 1H), 8.42–8.40 (m, 2H), 8.35 (s, 1H), 8.27 (d, *J* = 4 Hz, 1H), 8.10 (d, *J* = 2 Hz, 1H), 7.93 (d, *J* = 4 Hz, 2H), 7.81 (d, *J* = 4 Hz, 2H), 7.69 (t, *J* = 6 Hz, 1H), 7.60–7.52 (m, 3H), 7.44 (t, *J* = 6 Hz, 1H). <sup>13</sup>C NMR (125 MHz, DMSO-*d*<sub>6</sub>): δ (ppm) = 174.37, 151.37, 146.16, 141.87, 139.60, 138.44, 135.88, 130.98, 129.88, 129.56, 129.28, 128.91, 128.58, 127.68, 127.29, 127.20, 126.37, 121.39, 114.67 (19 signals expected and observed). IR: ν (cm<sup>-1</sup>) = 3186 (s), 1640 (s), 1597 (s), 1467 (s), 1281 (s).

## References

1. M. Rode, R. C. Gupta, B. K. Karale and S. S. Rindhe, *J. Heterocycl. Chem.*, 2008, **45**, 1597–1602.

**Table S1.** Comparison of the flavonol based photoCORMs.

| Compounds                               | $\lambda_{\text{abs}}$<br>(nm) | $\lambda_{\text{em}}$<br>(nm) | Stokes<br>shift<br>(nm) | $c$<br>( $\mu\text{M}$ ) | CO release                    |                          |                | Reference                                                              |
|-----------------------------------------|--------------------------------|-------------------------------|-------------------------|--------------------------|-------------------------------|--------------------------|----------------|------------------------------------------------------------------------|
|                                         |                                |                               |                         |                          | $\lambda_{\text{ir}}$<br>(nm) | $t_{\text{ir}}$<br>(min) | Yield<br>(%)   |                                                                        |
|                                         | 354<br>393<br>412              | 445<br>614                    | 202                     | 10                       | Visible<br>light              | 13                       | > 90           | This work                                                              |
|                                         | 360                            | 546                           | 122/<br>186             | 20                       | Visible<br>light              | 24                       | > 90           | <i>J. Mater. Chem. B</i> <b>2021</b> ,<br>9, 8263–8271.                |
|                                         | 359                            | 544                           | 155                     | 15                       | Visible<br>light              | 60                       | 82             | <i>New J. Chem.</i> <b>2022</b> , 46,<br>16151–16160.                  |
|                                         | 397                            | 464                           | 67                      | 10                       | Visible<br>light              | 30                       | > 90           | <i>Analyst</i> <b>2022</b> , 147,<br>3360–3369.                        |
|                                         | 410                            | 575                           | 165                     | 25                       | 419                           | ~8                       | 96             | <i>J. Am. Chem. Soc.</i> <b>2017</b> ,<br>139, 9435–9438.              |
|                                         | 401-<br>455                    | 576-<br>622                   | 138 -<br>209            | 5-100                    | 405/45<br>0<br>/460           |                          | 50±4 –<br>95±5 | <i>J. Org. Chem.</i> <b>2022</b> , 87,<br>4750–4763.                   |
|                                         | 445                            | 550                           | 105                     | 5                        | 419                           | 23                       | 99             | <i>ACS Med. Chem. Lett.</i><br><b>2022</b> , 13 (2), 236–242.          |
| a: R = H<br>b: R = NEt <sub>2</sub><br> | 480/5<br>50                    | 570/<br>625                   | 90/75                   | 50                       | 419,<br>> 546                 | 24 h                     | 100            | <i>ChemistryOpen</i> <b>2015</b> , 4,<br>590–594                       |
|                                         | 472                            | 572                           | 100                     | 5                        | 808                           | 48 h                     | 100            | <i>Adv. Healthcare Mater.</i><br><b>2021</b> , 10, 2001728             |
|                                         | 410                            | 575                           | 165                     | 25                       | 419                           | ~8                       | 96             | <i>Chempluschem</i> <b>2017</b> ,<br>82, 1408–1412.                    |
|                                         | 410                            | 480<br>610                    | 200                     | 50                       | 419                           |                          | 100            | <i>J. Med. Chem.</i> <b>2019</b> , 62<br>(21), 9990–9995.              |
|                                         | 410                            | 480<br>603                    | 193                     | 50                       | 419                           | ~24 h                    | 98-100         | <i>ACS Chem. Biol.</i> <b>2018</b> ,<br>13, 2220–2228.                 |
|                                         | 449                            | 500<br>600                    | 149                     | 2                        | 419                           | 90                       | 84             | <i>J. Am. Chem. Soc.</i> <b>2018</b> ,<br>140, 9721–9729.              |
|                                         | 449                            | 500<br>600                    | 149                     | 0.66<br>mM               | 419                           | 12                       | 90             | <i>RSC Adv.</i> , <b>2022</b> , 12,<br>2751–2758.                      |
|                                         | 410                            | 575                           | 165                     | 10                       | 405                           | 10                       | 96             | <i>Angew. Chemie - Int.<br/>Ed.</i> <b>2018</b> , 57, 12415–<br>12419. |
|                                         | 440                            | 568                           | 128                     | 50<br>$\mu\text{g/mL}$   | Xenon<br>lamp                 | 23                       | ~100           | <i>Chem. Eng. J.</i> , <b>2023</b> ,<br>463, 142371.                   |
|                                         | 445                            | 555                           | 110                     | 10                       | 460                           | 20                       | 99             | <i>Chem. Commun.</i> <b>2019</b> ,<br>55, 8987–8990.                   |



|  |                                 |            |       |           |            |      |              |                                                                     |
|--|---------------------------------|------------|-------|-----------|------------|------|--------------|---------------------------------------------------------------------|
|  | 791/793                         | 815/819    | 24/26 | 4         | 770/820    | ~180 | 125±15/131±6 | <i>Chem. - A Eur. J.</i> <b>2020</b> , 26 (58), 13184–13190.        |
|  | 749-755                         | 779-783    | 28-33 | 10        | 770        | 120  | 50±2 - 78±3  | <i>Chem. Commun.</i> , <b>2022</b> , 58, 8958-8961.                 |
|  | 360                             | 490        | 130   | 10        | 365        | 10   | 55           | <i>Chem. Commun.</i> <b>2019</b> , 55, 6301–6304.                   |
|  | 426<br>517<br>554<br>591<br>650 | 652<br>717 | 67    | 5         | 440        | 240  | 330          | <i>chemRxiv</i><br>10.26434/chemrxiv-2022-b5611                     |
|  | 356                             | 532        | 176   | 0.1 g/L   | 650<br>365 | 90   | 69/58        | <i>Angew. Chemie Int. Ed.</i> <b>2021</b> , 60 (24), 13513–13520.   |
|  | 540                             | 620<br>680 | 140   | 30 µg/mL  | 290–800    | 2.5  | ~100         | <i>Nano Res.</i> <b>2023</b><br>s12274-023-5458-8                   |
|  | 245<br>321                      | 475<br>607 | 286   | 0.1 g/L   | 410        | 200  | 63.3         | <i>Polymers.</i> , <b>2022</b> , 14, 2416                           |
|  | 410                             | 603        | 193   | 100 µg/mL | 410        | 120  | ~40          | <i>Angew. Chem. Int. Ed.</i> <b>2022</b> , 61 (3), e202112782.      |
|  | 270,<br>334                     | 600        | 266   | 0.1 g/L   | 410        | 40   | 35.1         | <i>Angew. Chemie - Int. Ed.</i> <b>2020</b> , 59 (49), 21864–21869. |
|  | 270<br>336<br>385               | 606        | 221   | 0.1 g/L   | 410        | 180  | 96           | <i>Chem. Sci.</i> <b>2020</b> , 11 (17), 4499–4507.                 |
|  | 272<br>338<br>391               | 497<br>609 | 218   | 0.1 g/L   | 410        | 120  | 31.1         | <i>Macromol. Rapid Commun.</i> <b>2020</b> , 41, 2000323–2000331.   |
|  | 409                             | 577        | 168   | 0.1 mM    | 410        | 8    | 58           | <i>iScience</i> <b>2020</b> , 23 (9), 101483–101493.                |
|  | 334                             |            |       | 10 mM     | 980        | 15   | 93           | <i>Chem. Commun.</i> , <b>2022</b> , 58, 8512-8515.                 |

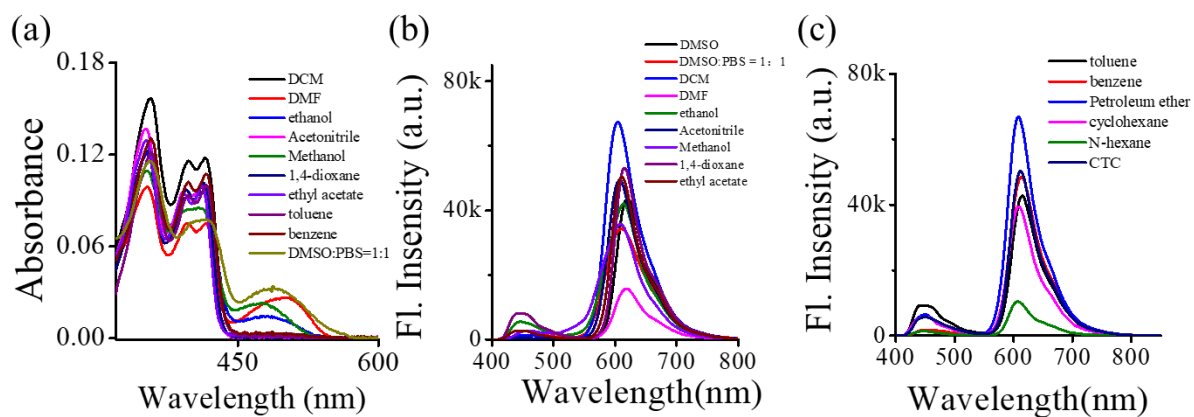

**Figure S1.** Spectral features of **Nbp-flaH** in various solvents (1% DMSO) at 37 °C. (a) absorption spectra. Fluorescence spectra (b) in polar and/or protic solvents, (c) in non-polar and non-protic solvents. (10  $\mu$ M,  $\lambda_{\text{ex}} = 405$  nm, slit width:  $d_{\text{ex}}/d_{\text{em}} = 10$  nm)

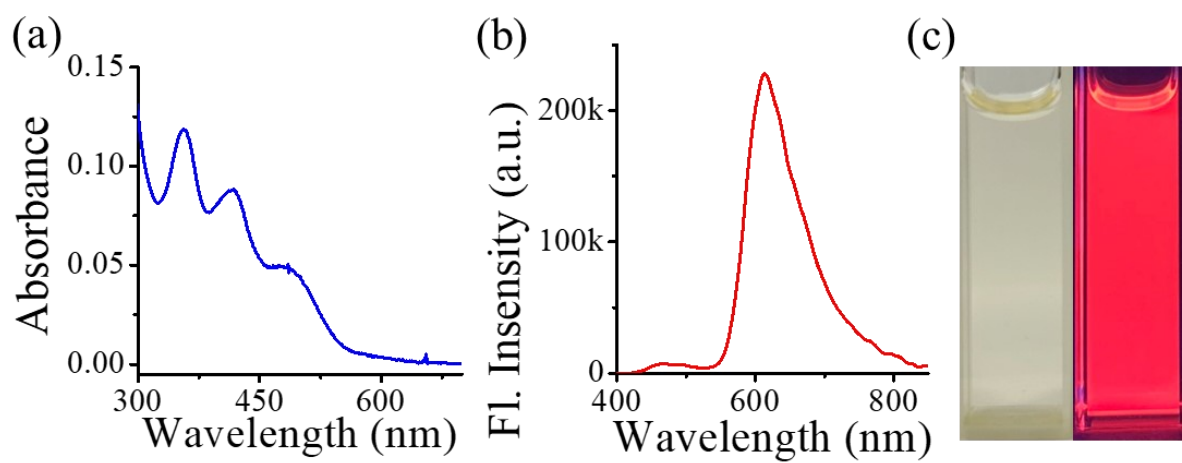

**Figure S2.** (a) Absorption and (b) fluorescence spectra of **Nbp-flaH**. (c) The photos of the corresponding solution color under ambient light (left) and 365 nm light (right). Conditions: 10  $\mu$ M in 3 mL DMSO-PBS buffer (1:1, V/V, 10 mM, pH 7.4),  $\lambda_{\text{ex}} = 405$  nm, slit width:  $d_{\text{ex}}/d_{\text{em}} = 10$  nm.

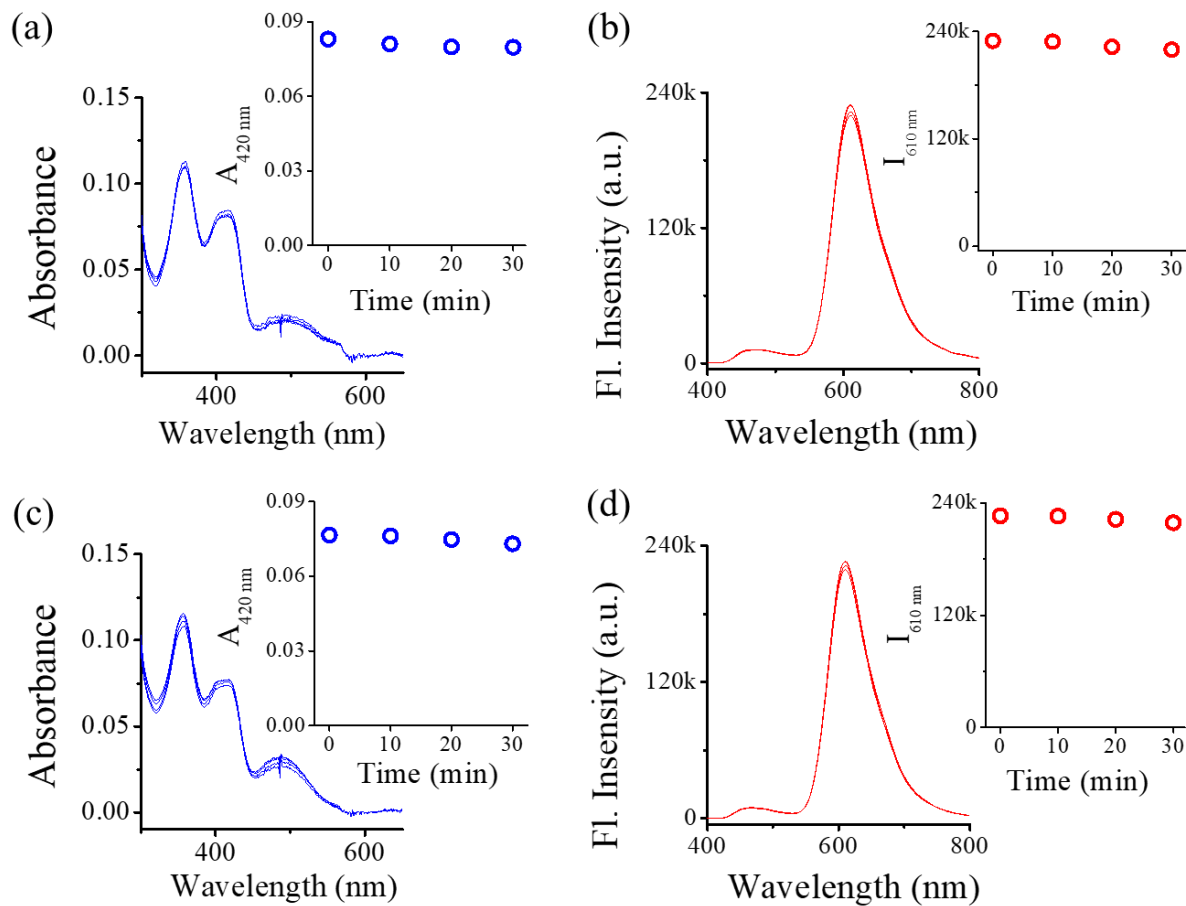

**Figure S3.** The time-dependent spectral change and time traces (insets) of **Nbp-flaH** under  $N_2$  and dark. (a) absorption and (b) emission spectra under  $N_2$ ; Insets: (a)  $A_{420 \text{ nm}}$  and (b)  $I_{610 \text{ nm}}$ ; (c) absorption and (d) emission spectra under dark; Insets: (c)  $A_{420 \text{ nm}}$  and (d)  $I_{610 \text{ nm}}$ . Conditions: **Nbp-flaH**  $10 \mu\text{M}$  in DMSO-PBS buffer (1:1, V/V, 10 mM, pH 7.4),  $\lambda_{\text{ex}} = 405 \text{ nm}$ , slit width:  $d_{\text{ex}}/d_{\text{em}} = 10 \text{ nm}$ .

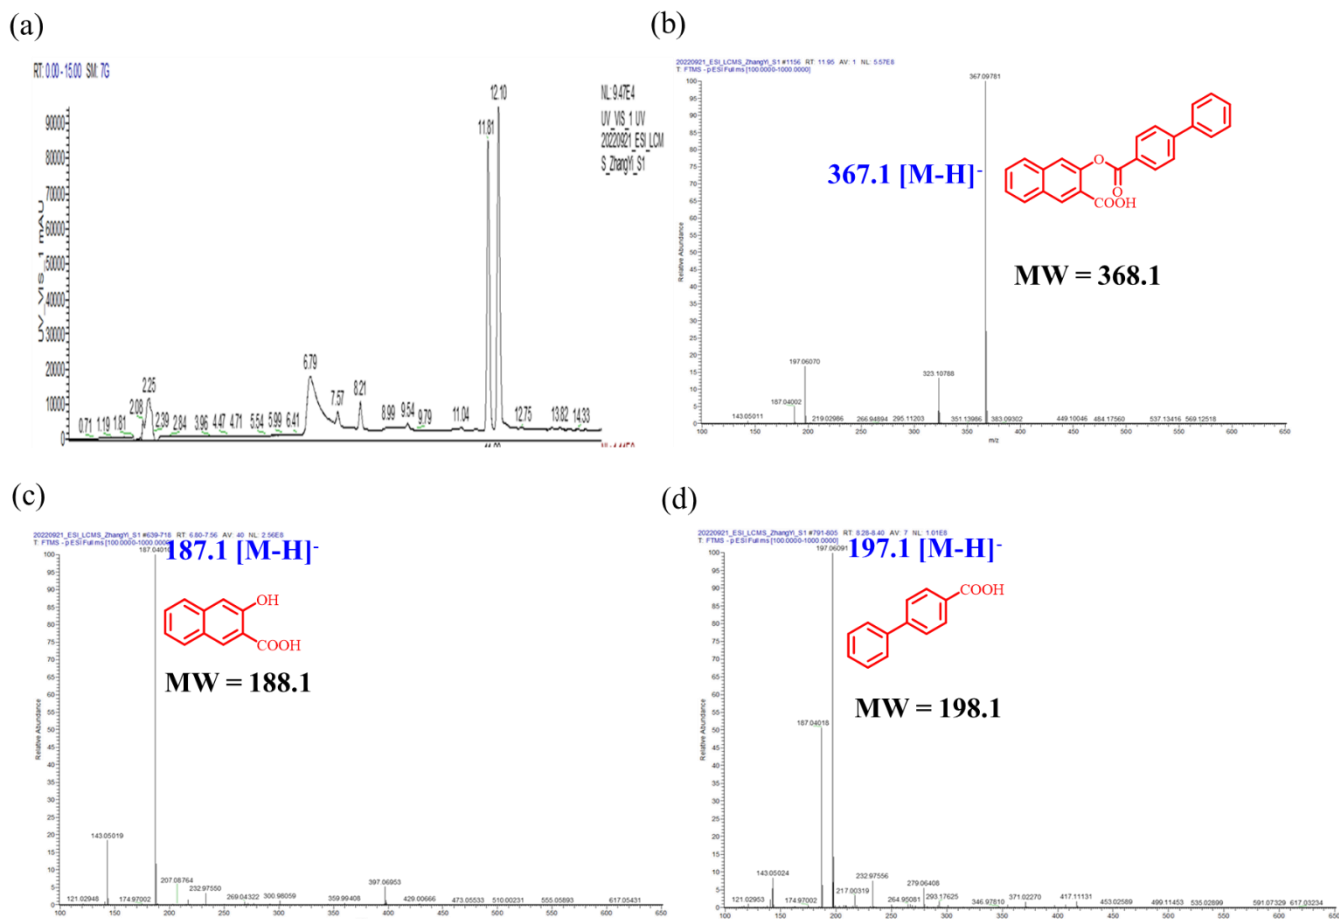

**Figure S4.** HPLC–MS spectra for the photo-reaction organic products from **Nbp-flaH**. (a) HPLC spectrum. MS spectra of (b) **Nbp-flaH-HObs** ( $m/z$  (neg.): 367.1 (M–H)<sup>-</sup>), (c) 3-hydroxy-2-naphthoic acid ( $m/z$  (neg.): 187.1.1 (M–H)<sup>-</sup>), (d) [1,1'-biphenyl]-4-carboxylic acid ( $m/z$  (neg.): 197.1 (M–H)<sup>-</sup>).

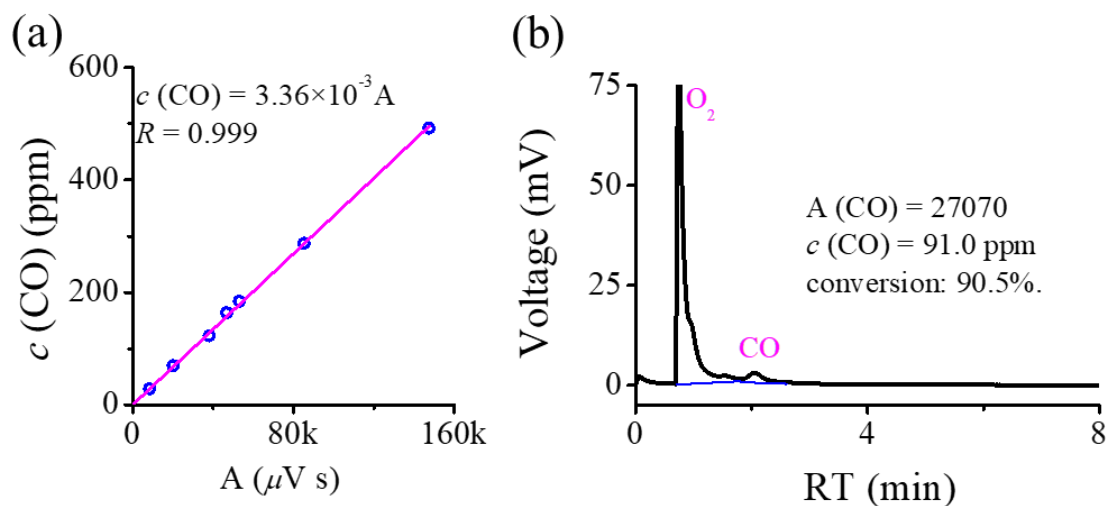

**Figure S5.** (a) The calibration curve of the CO concentration analysis by GC analysis. (b) GC spectrum for the photo-reaction gas product CO from **Nbp-flaH** ( $30 \mu\text{M}$  in ethanol with 1% DMSO) irradiated by sunlight ( $17^\circ\text{C}$ , 3 h). “A” represents the peak area.

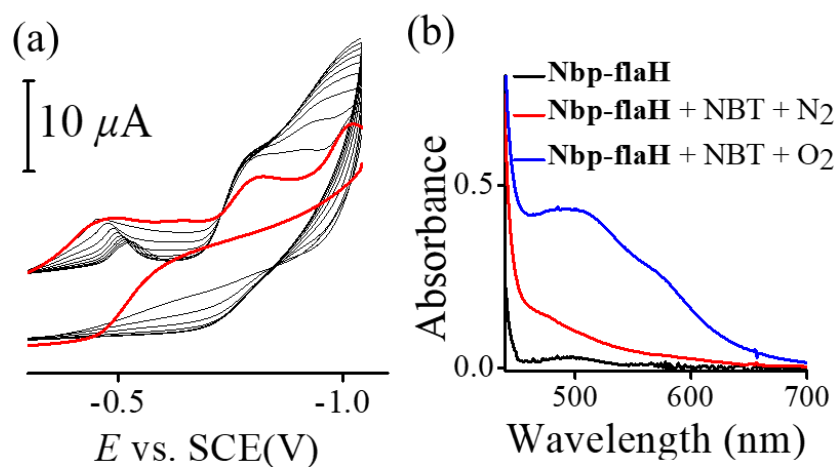

**Figure S6.** (a) Cyclic voltammograms of **Nbp-flaH** (2 mM in DMF) under  $N_2$  (red), subsequently under air (black) at rt. (b) Absorption spectra of **Nbp-flaH** (0.4 mM in DMF) in the absence (under  $N_2$ , black) and presence of NBT (0.4 mM in DMF) under  $N_2$  (red) and  $O_2$  (blue) at rt.

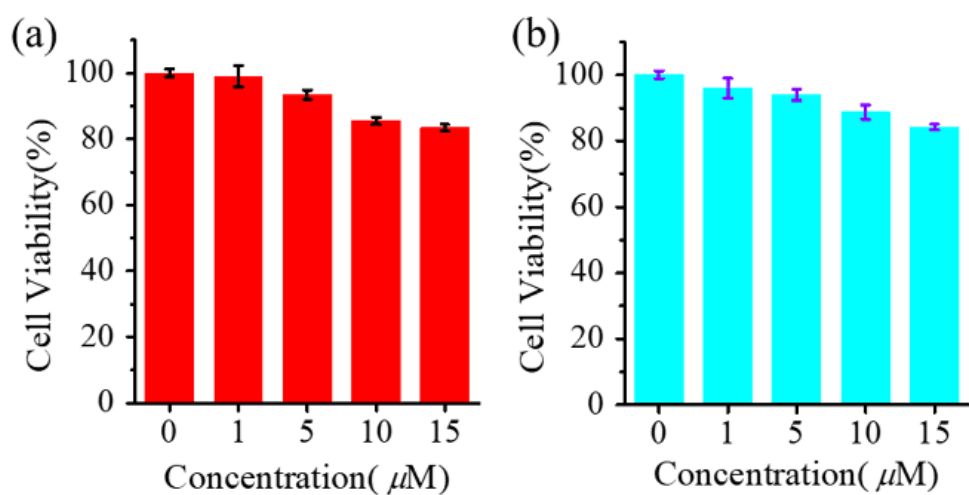

**Figure S7.** Plots of the cell viability vs. analyte concentration (a) **Nbp-flaH**, (b) the **Nbp-flaH** photolysis products (incubation time: 24 h). Error bars in column represent standard deviations of three independent measurements.



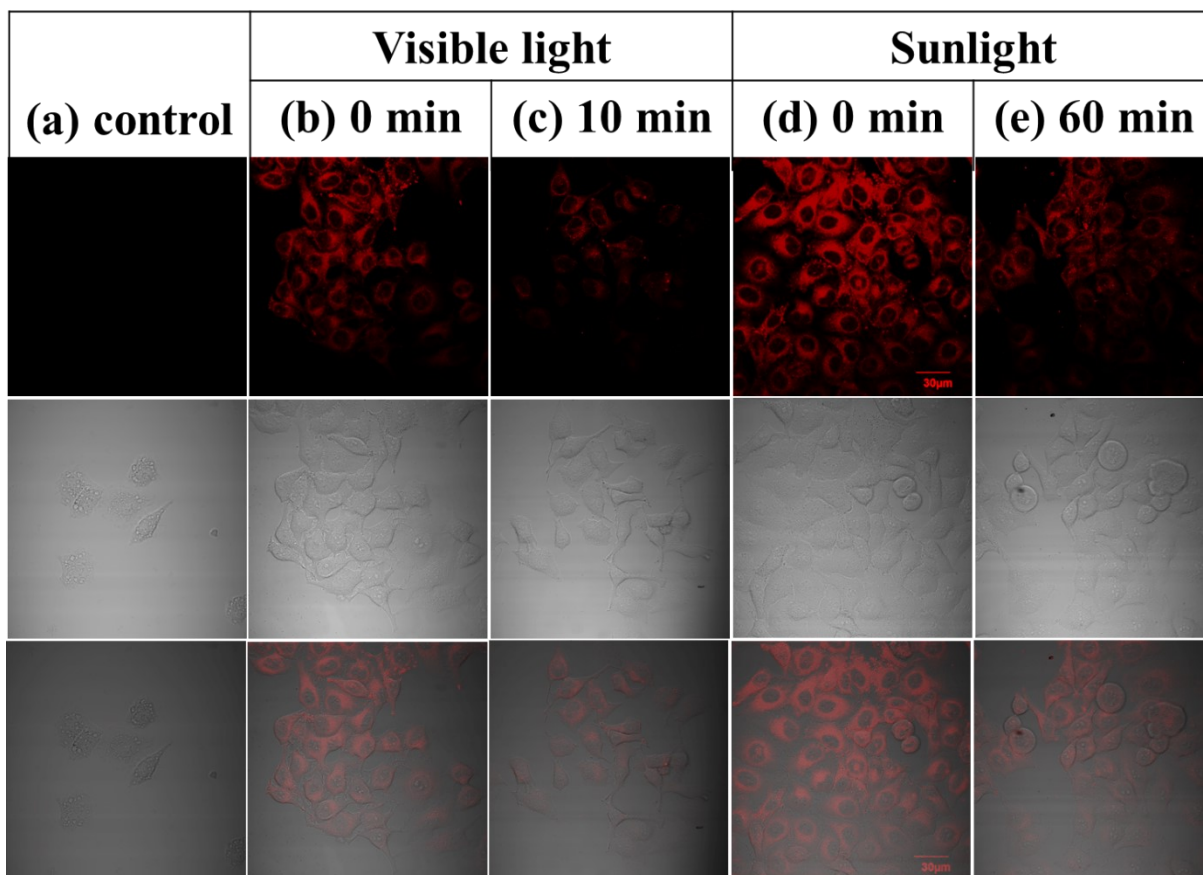

**Figure S8.** The confocal fluorescence images of before and after the **Nbp-flaH**-treated HeLa cells were irradiated by visible light or sun light in air at rt. (a) control, visible light (b) 0 min and (c) 10 min, sun light (d) 0 min and (e) 1 h. First row: red channel; second row: bright field; third row: merged. Conditions: 10  $\mu\text{M}$  in isotonic saline solution with 0.2% DMSO, 30 min; visible light intensity =  $5.6 \times 10^2$  lx; sun light: 17  $^\circ\text{C}$ .

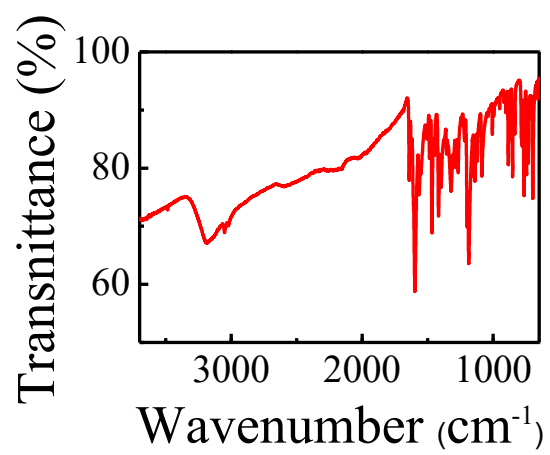

**Figure S9.** FT-IR spectrum of **Nbp-flaH**

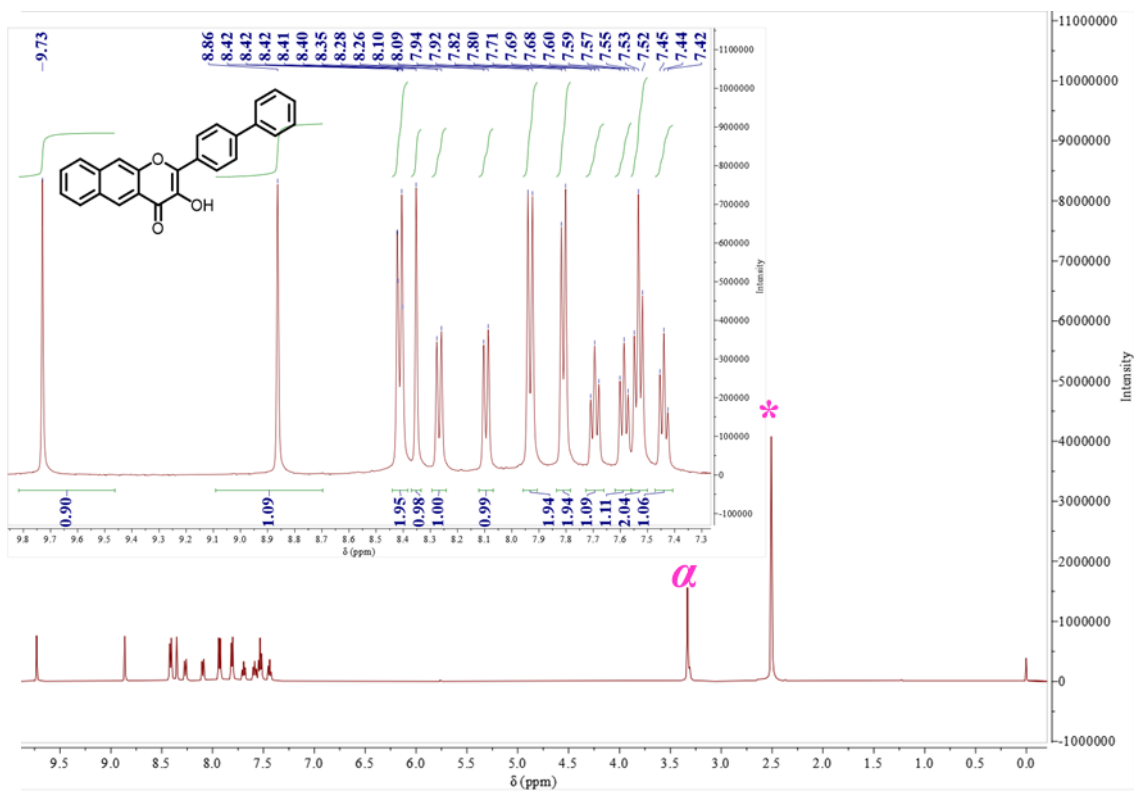

**Figure S10.**  $^1\text{H}$  NMR (400 MHz) spectrum of **Nbp-flaH** in  $\text{DMSO-}d_6$  at ambient temperature. The \* indicates the signal from residual DMSO in the solvent. The  $\alpha$  indicates the signal from the residual water in the solvent.

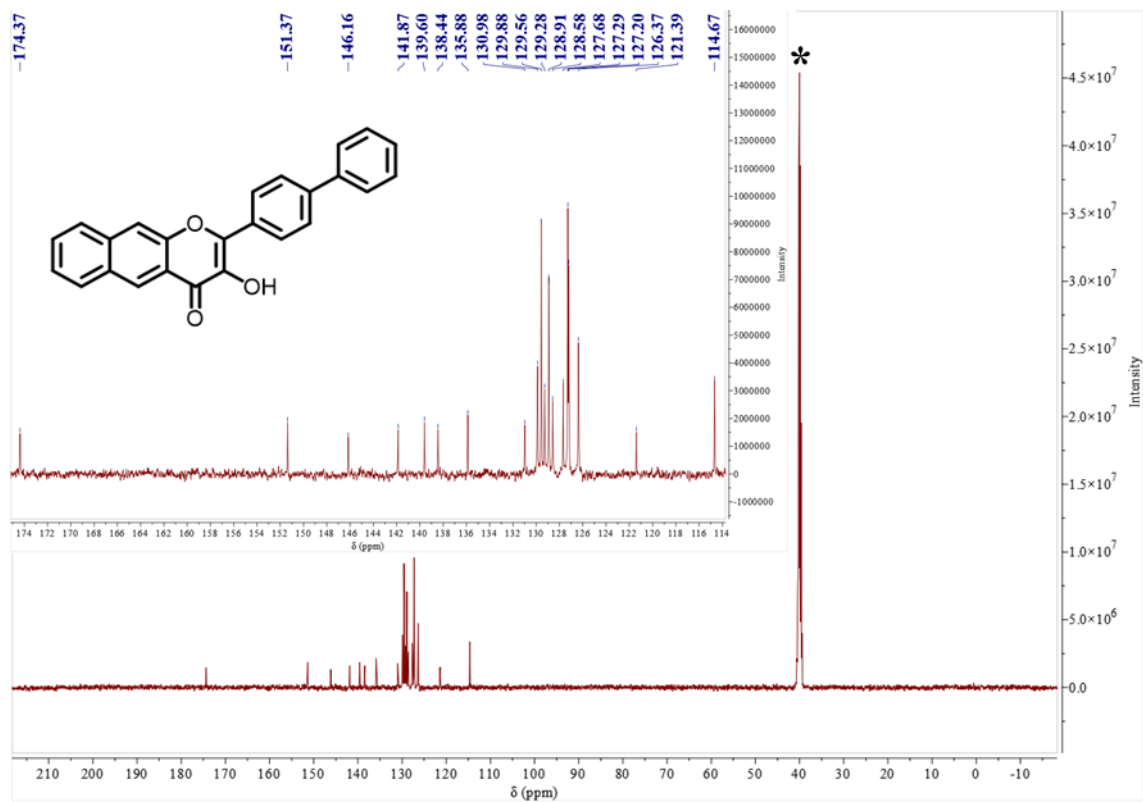

**Figure S11.**  $^{13}\text{C}$  NMR (125 MHz) spectrum of **Nbp-flaH** in  $\text{DMSO-}d_6$  at ambient temperature.

The \* indicates the signal from residual DMSO in the solvent.

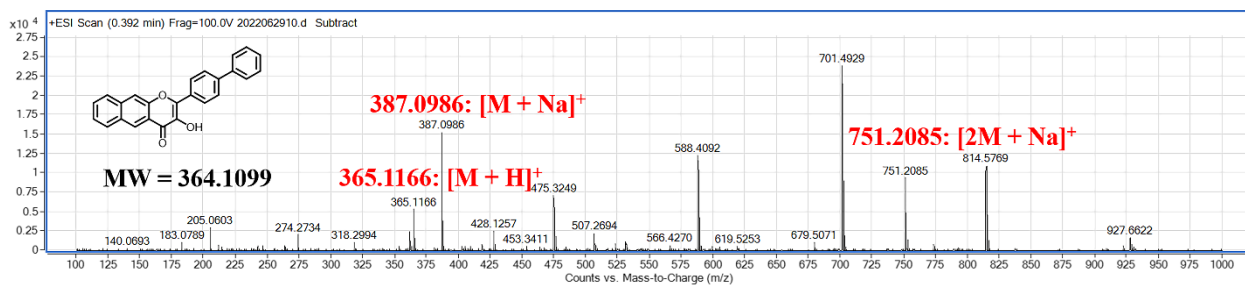

**Figure S12.** HRMS spectrum of **Nbp-flaH** in ethanol.
